# Supplementary material for: Using quantitative systems pharmacology to evaluate the drug efficacy of COX-2 and 5-LOX inhibitors in therapeutic situations
Source: PubMed Central journal article supplement (PMC6072773; doi:10.1038/s41540-018-0062-3), 2018-08-03
Supplement: 41540_2018_62_MOESM2_ESM.pdf [file 41540_2018_62_MOESM2_ESM.pdf]

**Supplementary Table S1. Potential use of the PBPK/PD QSP approach in drug development.**

Potential use of the presented PBPK/PD QSP approach in different phases of the drug development process. The conditions to apply the approach and the potential usage are additionally presented.

| <b>Phase</b>                              | <b>Conditions</b>                                                                                                          | <b>Usage</b>                              |
|-------------------------------------------|----------------------------------------------------------------------------------------------------------------------------|-------------------------------------------|
| <b>Lead optimization/<br/>Preclinical</b> | - Target identification + Network modeling<br>- In vitro binding data (e.g. IC50)<br>- Physicochemistry, PPB, ADME screens | Efficacy                                  |
|                                           | - Adverse outcome pathway<br>- 2 <sup>nd</sup> target, IC50 of 2 <sup>nd</sup> target<br>- In vitro toxicity data          | On-target toxicity<br>Off-target toxicity |
| <b>Preclinical</b>                        | - Animal in vivo PK data<br>- In vivo PD data                                                                              | Optimize dosing                           |
| <b>First in human</b>                     | - In vitro binding data (e.g. IC50)                                                                                        | Efficacy                                  |
| <b>Clinical</b>                           | - Human in vivo PK data<br>- Clinical outcome data                                                                         | Optimize dosing                           |
|                                           | - CYP inducer/inhibitor<br>- ADME/PK perpetrator drug                                                                      | Clinical DDI study                        |
