# Supplementary material for: Using quantitative systems pharmacology to evaluate the drug efficacy of COX-2 and 5-LOX inhibitors in therapeutic situations
Source: PubMed Central journal article supplement (PMC6072773; doi:10.1038/s41540-018-0062-3), 2018-08-03
Supplement: 41540_2018_62_MOESM4_ESM.pdf [file 41540_2018_62_MOESM4_ESM.pdf]

### Supplementary Table S3. ADME processes implemented in the PBPK models.

Metabolizing reactions, active transport processes (influx, efflux), and clearance processes (renal, biliary, hepatic) that were implemented in the PBPK models to represent specific ADME behavior. In case of CEL and ZLT, renal clearance is represented by glomerular filtration (GFR), and GFR and tubular secretion, respectively. Diclofenac, DFN; hydroxy, OH; acyl glucuronide, AGLU; celecoxib, CEL; carboxy, COOH; glucuronide, GLU; zileuton, ZLT; sulfoxide, SO; licofelone, LCF; rifampicin, RIF; desacetyl, DA.

| ID | Drug / Metabolite | Metabolite / transporter type / clearance process | Metabolic enzyme / transporter / clearance type | Km [μmol/l]        | kcat / specific clearance [1/min]* |
|----|-------------------|---------------------------------------------------|-------------------------------------------------|--------------------|------------------------------------|
| 1  | CEL               | OH-CEL                                            | CYP2C9 (zero 2C9*3) <sup>1</sup>                | 5.1 <sup>1</sup>   | 9.4                                |
| 1  | CEL               | OH-CEL                                            | CYP2C9 (one 2C9*3) <sup>1</sup>                 | 5.9 <sup>1</sup>   | 7.1                                |
| 1  | CEL               | OH-CEL                                            | CYP2C9 (two 2C9*3) <sup>1</sup>                 | 11.0 <sup>1</sup>  | 4.0                                |
| 1  | OH-CEL            | COOH-CEL                                          | ADH2 <sup>1</sup>                               | 10.0 <sup>1</sup>  | 54.7                               |
| 1  | COOH-CEL          | Hepatic                                           | UGT1A1 <sup>2</sup>                             | 100.5*             | 326.4                              |
| 1  | CEL               | Renal <sup>2</sup>                                | Glomerular filtration <sup>3</sup>              | /                  | 8.00**                             |
| 2  | DFN               | 3'-OH-DFN                                         | CYP2C9 <sup>4</sup>                             | 9.0 <sup>5</sup>   | 1.5                                |
| 2  | DFN               | 4'-OH-DFN                                         | CYP2C9 <sup>4</sup>                             | 9.0 <sup>5</sup>   | 67.7                               |
| 2  | DFN               | 5-OH-DFN                                          | CYP3A4 <sup>6</sup>                             | 43.0 <sup>5</sup>  | 6.8                                |
| 2  | DFN               | DFN-AGLU                                          | UGT2B7 <sup>6</sup>                             | 105.9*             | 14232.1                            |
| 2  | DFN               | Influx                                            | OAT2 <sup>7</sup>                               | 48.8 <sup>7</sup>  | 19482.5                            |
| 2  | DFN-AGLU          | Influx                                            | OAT2 <sup>7</sup>                               | 8.6 <sup>7</sup>   | 3696.3                             |
| 2  | DFN               | Renal <sup>2</sup>                                | Plasma clearance                                | /                  | 0.008                              |
| 2  | DFN-AGLU          | Renal <sup>7</sup>                                | Plasma clearance                                | /                  | 315.8                              |
| 2  | 3'-OH-DFN         | Hepatic <sup>6,2</sup>                            | Plasma clearance                                | /                  | 2.8                                |
| 2  | 4'-OH-DFN         | Hepatic <sup>6,2</sup>                            | Plasma clearance                                | /                  | 25.6                               |
| 2  | 5-OH-DFN          | Hepatic <sup>6,2</sup>                            | Plasma clearance                                | /                  | 15.3                               |
| 3  | LCF               | LCF-AGLU                                          | UGT2B7 <sup>6,8,9</sup>                         | 10.0               | 340.6                              |
| 3  | LCF               | OH-LCF                                            | CYP2J2 <sup>6,8,9</sup>                         | 10.0               | 49.0                               |
| 3  | LCF               | Renal <sup>10</sup>                               | Plasma clearance                                | /                  | 15.8                               |
| 3  | LCF-AGLU          | Hepatic <sup>6</sup>                              | Plasma clearance                                | /                  | 4905.0                             |
| 3  | OH-LCF            | Hepatic <sup>6</sup>                              | Plasma clearance                                | /                  | 4922.4                             |
| 4  | RIF               | Influx                                            | OATP-C <sup>11</sup>                            | 1.21 <sup>11</sup> | 0.08                               |
| 4  | RIF               | Efflux                                            | ABCB1 <sup>12</sup>                             | 68.5*              | 21.5                               |
| 4  | RIF               | DA-RIF                                            | CES2 <sup>13</sup>                              | 53.0*              | 1.2                                |
| 4  | RIF               | Renal <sup>14</sup>                               | Plasma clearance                                | /                  | 0.05                               |
| 4  | DA-RIF            | Biliary <sup>15</sup>                             | Plasma clearance                                | /                  | 0.2                                |
| 4  | DA-RIF            | Renal <sup>15</sup>                               | Plasma clearance                                | /                  | 3.8                                |
| 5  | ZLT               | ZLT-SO                                            | CYP3A4 <sup>2</sup>                             | 0.8*               | 0.4                                |
| 5  | ZLT               | OH-ZLT                                            | CYP1A2 <sup>2</sup>                             | 0.4*               | 0.2                                |
| 5  | ZLT               | ZLT-GLU                                           | UGT1A9 <sup>2</sup>                             | 0.9*               | 10056.9                            |
| 5  | ZLT-SO            | Renal <sup>16</sup>                               | Tubular secretion <sup>16</sup>                 | /                  | 6.2                                |
| 5  | OH-ZLT            | Renal <sup>16</sup>                               | Tubular secretion <sup>16</sup>                 | /                  | 6.2                                |
| 5  | ZLT-GLU           | Renal <sup>16</sup>                               | Tubular secretion <sup>16</sup>                 | /                  | 2.5                                |
| 5  | ZLT-SO            | Renal <sup>16</sup>                               | Glomerular filtration <sup>16</sup>             | /                  | 1.3**                              |
| 5  | OH-ZLT            | Renal <sup>16</sup>                               | Glomerular filtration <sup>16</sup>             | /                  | 1.3**                              |
| 5  | ZLT-GLU           | Renal <sup>16</sup>                               | Glomerular filtration <sup>16</sup>             | /                  | 1.3**                              |

\* fitted to experimental data

\*\* [GFR fraction]

## REFERENCES

1. Sandberg, M., Yasar, Ü., Strömberg, P., Höög, J. O. & Eliasson, E. Oxidation of celecoxib by polymorphic cytochrome P450 2C9 and alcohol dehydrogenase. *Br. J. Clin. Pharmacol.* **54**, 423–429 (2002).
2. Wishart, D. S. *et al.* DrugBank: a comprehensive resource for in silico drug discovery and exploration. *Nucleic Acids Res* **34**, D668–D672 (2006).
3. Davies, N. M., McLachlan, A. J., Day, R. O. & Williams, K. M. Clinical Pharmacokinetics and Pharmacodynamics of Celecoxib. *Clin. Pharmacokinet.* **38**, 225–242 (2000).
4. Yasar, Ü. *et al.* The role of CYP2C9 genotype in the metabolism of diclofenac in vivo and in vitro. *Eur. J. Clin. Pharmacol.* **57**, 729–735 (2001).
5. Bort, R. *et al.* Hepatic metabolism of diclofenac: role of human CYP in the minor oxidative pathways. *Biochem. Pharmacol.* **58**, 787–796 (1999).
6. Zhou, S. F., Zhou, Z. W., Yang, L. P. & Cai, J. P. Substrates, inducers, inhibitors and structure-activity relationships of human cytochrome P450 2C9 and implications in drug development. *Curr. Med. Chem.* **16**, 3480–3675 (2009).
7. Zhang, Y. *et al.* Diclofenac and Its Acyl Glucuronide: Determination of in Vivo Exposure in Human Subjects and Characterization as Human Drug Transporter Substrates in Vitro. *Drug Metab. Dispos.* **44**, 320–328 (2016).
8. Gao, J., Fan, H. & Mei, L. Asian Journal of Pharmacodynamics and Pharmacokinetics Pharmacological activities and pharmacokinetics of licofelone. **2010**, 287–299 (2010).
9. Albrecht, W., Unger, A., Nussler, A. K. & Laufer, S. In Vitro Metabolism of 2- [ 6- ( 4-Chlorophenyl ) -2 , 2-dimethyl-7- phenyl-2 , 3-dihydro-1 H -pyrrolizin-5-yl ] Acetic Acid ( Licofelone , ML3000 ), an Inhibitor of Cyclooxygenase-1 and -2 and 5-Lipoxygenase. **36**, 894–903 (2008).
10. Deigner, H. P., Freyberg, C. E. & Laufer, S. Distribution and excretion of [14C]-labelled [2,2-dimethyl-6-(4-chlorophenyl)-7-phenyl-2,3-dihydro-1H-pyrrolizine-5-yl]- [2'-14C]-acetic acid in rats. *Arzneimittelforschung.* **45**, 272–6 (1995).
11. Tirona, R. G. *et al.* Human Organic Anion Transporting Polypeptide-C ( SLC21A6 ) Is a Major Determinant of Rifampin-Mediated Pregnane X Receptor Activation. *Pharmacology* **304**, 223–228 (2003).
12. Williamson, B., Dooley, K. E., Zhang, Y., Back, D. J. & Owen, A. Induction of influx and efflux transporters and cytochrome P450 3A4 in primary human hepatocytes by rifampin, rifabutin, and rifapentine. *Antimicrob. Agents Chemother.* **57**, 6366–6369 (2013).
13. Song, S. H. *et al.* Relationship between CES2 genetic variations and rifampicin metabolism. *J. Antimicrob. Chemother.* **68**, 1281–1284 (2013).
14. FDA. Food and Drug Administration. Drugs@FDA [http://www.accessdata.fda.gov/drugsatfda\\_docs/label/2010/050420s073,050627s012lbl.pdf](http://www.accessdata.fda.gov/drugsatfda_docs/label/2010/050420s073,050627s012lbl.pdf) [Accessed 29 September 2015]. (2015).
15. Acocella, G. Clinical pharmacokinetics of rifampicin. *Clin. Pharmacokinet.* **3**, 108–127 (1978).
16. Wong, S. L. *et al.* The Pharmacokinetics of Single Oral Doses of Zileuton 200 to 800mg, its Enantiomers, and its Metabolites, in Normal Healthy Volunteers. *Clin. Pharmacokinet.* **29**, 9–21 (1995).
