# Supplementary material for: Using quantitative systems pharmacology to evaluate the drug efficacy of COX-2 and 5-LOX inhibitors in therapeutic situations
Source: PubMed Central journal article supplement (PMC6072773; doi:10.1038/s41540-018-0062-3), 2018-08-03
Supplement: 41540_2018_62_MOESM5_ESM.pdf [file 41540_2018_62_MOESM5_ESM.pdf]

**Supplementary Table S4. Model evaluation.**

Evaluation of different models used to describe predicted prostaglandin decrease and mean pain relief observed in patients. SSE, RMSE,  $R^2_{adj}$  are calculated by use of the curve fitting toolbox of MATLAB. AICc and BIC are calculated according to Spiess et al.<sup>1</sup> The three-parameter hill model can be found in Goutelle et al.<sup>2</sup> Diclofenac, DFN; celecoxib, CEL; bias-corrected Akaike Information Criterion, AICc; Bayesian Information Criterion, BIC; Sum of squares due to error, SSE; Root mean squared error, RMSE; Degree-of-freedom adjusted coefficient of determination,  $R^2_{adj}$ ; number of parameters, #p.

| <b>Drug (time)</b> | <b>Model (#p)</b> | <b>AICc</b> | <b>BIC</b> | <b>SSE</b> | <b>RMSE</b> | <b><math>R^2_{adj}</math></b> |
|--------------------|-------------------|-------------|------------|------------|-------------|-------------------------------|
| DFN (6h)           | Linear (2)        | 15.88       | 18.47      | 2.74       | 0.30        | 0.86                          |
| DFN (6h)           | Hill (3)          | -6.27       | -2.61      | 1.30       | 0.21        | 0.93                          |
| DFN (6h)           | Quadratic (3)     | 3.67        | 7.34       | 1.76       | 0.24        | 0.91                          |
| CEL (6h)           | Linear (2)        | 9.85        | 9.15       | 0.96       | 0.33        | 0.85                          |
| CEL (6h)           | Hill (3)          | -13.14      | -15.37     | 0.08       | 0.10        | 0.98                          |
| CEL (24h)          | Linear (2)        | 33.1        | 34.23      | 4.95       | 0.54        | 0.32                          |
| CEL (24h)          | Hill (3)          | 1.25        | 2.48       | 0.80       | 0.22        | 0.88                          |

## REFERENCES

1. Spiess, A. N. & Neumeyer, N. An evaluation of R<sup>2</sup> as an inadequate measure for nonlinear models in pharmacological and biochemical research: A Monte Carlo approach. *BMC Pharmacol.* **10**, 1–11 (2010).
2. Goutelle, S. *et al.* The Hill equation: A review of its capabilities in pharmacological modelling. *Fundam. Clin. Pharmacol.* **22**, 633–648 (2008).
